# Supplementary material for: Comparative Characterization and Pathogenicity of a Novel Porcine Epidemic Diarrhea Virus (PEDV) with a Naturally Occurring Truncated ORF3 Gene Coinfected with PEDVs Possessing an Intact ORF3 Gene in Piglets
Source: MDPI journal article supplement (doi:10.3390/v13081562), 2021-08-07
Supplement: s1 [file s1]

**Supplementary Table S1.** Information regarding the reference strains of PEDV.

| <b>Virus strain</b>      | <b>Country of origin</b> | <b>Collection date</b> | <b>Accession number</b> |
|--------------------------|--------------------------|------------------------|-------------------------|
| CH/S                     | China                    | 1986                   | JN547228.1              |
| CV777                    | Switzerland              | 2001                   | AF353511.1              |
| LZC                      | China                    | 2006                   | EF185992.1              |
| JS2008                   | China                    | 2008                   | KC109141.1              |
| virulent DR13            | South Korea              | 2009                   | JQ023161.1              |
| CH/FJND-3/2011           | China                    | 2011                   | JQ282909.1              |
| AJ1102                   | China                    | 2011                   | JX188454.1              |
| BJ-2011-1                | China                    | 2011                   | JN825712.1              |
| AH 2012/12               | China                    | 2012                   | KU646831.1              |
| CH/FJZZ-9/2012           | China                    | 2012                   | KC140102.1              |
| CH/ZJCX-1/2012           | China                    | 2012                   | KF840537.1              |
| GD-A                     | China                    | 2012                   | JX112709.1              |
| GDS23                    | China                    | 2012                   | MH107322.1              |
| JS-HZ2012                | China                    | 2012                   | KC210147.1              |
| KC189944.1               | China                    | 2012                   | KC189944.1              |
| CHYJ130330               | China                    | 2013                   | KJ020932.1              |
| FL2013                   | China                    | 2013                   | KP765609.1              |
| KGS-1/JPN/2013           | Japan                    | 2013                   | LC063814.1              |
| NPL-PEDv/2013            | USA                      | 2013                   | KJ778615.1              |
| PC21A                    | USA                      | 2013                   | KR078299.1              |
| PC22A                    | USA                      | 2013                   | KX683006.1              |
| USA/Colorado/2013        | USA                      | 2013                   | KF272920.1              |
| USA/NorthCarolina66/2013 | USA                      | 2013                   | KJ645662.1              |
| TC PC168-P2              | USA                      | 2013                   | KM392226.1              |
| USA/Iowa/18984/2013      | USA                      | 2013                   | KF804028.1              |
| CO/P14/IC                | USA                      | 2013                   | KU558702.1              |
| MEX/104/2013             | Mexico                   | 2013                   | KJ645708.1              |
| USA/Indiana34/2013       | USA                      | 2013                   | KJ645641.1              |
| USA/Minnesota76/2013     | USA                      | 2013                   | KJ645671.1              |
| USA/NC/2013/35140        | USA                      | 2013                   | KM975735.1              |
| USA/Tennessee56/2013     | USA                      | 2013                   | KJ645654.1              |
| USA/Minnesota90/2013     | USA                      | 2013                   | KJ645682.1              |
| USA/Illinois98/2013      | USA                      | 2013                   | KJ645690.1              |
| USA/Kansas46/2013        | USA                      | 2013                   | KJ645650.1              |
| OH15962                  | USA                      | 2013                   | KJ584361.1              |
| CH/GDZHDM/1401           | China                    | 2014                   | KX016034.1              |
| LNCT2                    | China                    | 2014                   | KT323980.1              |
| PEDV-WS                  | China                    | 2014                   | KM609213.1              |
| FR/001/2014              | France                   | 2014                   | KR011756.1              |
| KNU-141112-feces         | South Korea              | 2014                   | KR873431.1              |

|                               |        |      |            |
|-------------------------------|--------|------|------------|
| COL/Cundinamarca/2014         | USA    | 2014 | KU569509.1 |
| OH8593-14                     | USA    | 2014 | KP641662.1 |
| USA/2014/IL/20697 P7          | USA    | 2014 | KT591944.1 |
| USA/IL20697/2014 Passage 5    | USA    | 2014 | KT860508.1 |
| USA/Illinois259/2014          | USA    | 2014 | KR265785.1 |
| USA/Iowa161/2014              | USA    | 2014 | KR265805.1 |
| USA/Kansas431/2014            | USA    | 2014 | KR265819.1 |
| OH9097-14                     | USA    | 2014 | KP641663.1 |
| USA/Nebraska288/2014 from USA | USA    | 2014 | KR265803.1 |
| USA/Missouri373/2014 from USA | USA    | 2014 | KR265844.1 |
| USA/MO/2014/03293             | USA    | 2014 | KM975741.1 |
| USA/Nebraska287/2014          | USA    | 2014 | KR265765.1 |
| USA/Ohio123/2014              | USA    | 2014 | KJ645699.1 |
| HLJBY                         | China  | 2015 | KP403802.1 |
| CH/GX/2015/750A               | China  | 2015 | KY793536.1 |
| CH/HNAY/2015                  | China  | 2015 | KR809885.1 |
| CH/HNLH/2015                  | China  | 2015 | KT199103.1 |
| CH/YNKM-8/2013                | China  | 2015 | KF761675.1 |
| YN15                          | China  | 2015 | KT021228.1 |
| YN90                          | China  | 2015 | KT021231.1 |
| PC22A-P100-C6                 | USA    | 2015 | KU893871.1 |
| PEDV/USA/Minnesota125/2015    | USA    | 2015 | KU982980.1 |
| PEDV/MEX/PUE/01/2015          | Mexico | 2015 | MH004421.1 |
| PEDV/USA/NorthDakota93/2015   | USA    | 2015 | KU982970.1 |
| PEDV/USA/Oklahoma133/2015     | USA    | 2015 | KU982968.1 |
| CH/JLDH/2016                  | China  | 2016 | MF346935.1 |
| CH/HNZZ47/2016                | China  | 2016 | KX981440.1 |
| CHN/SH-2016-4/2016            | China  | 2016 | MG837012.1 |
| JSCZ1601                      | China  | 2016 | KY070587.1 |
| PEDV-LNsy                     | China  | 2016 | KY007140.1 |
| PEDV 1842/2016 ITA            | Italy  | 2016 | KY111278.1 |
| B5-HB2017                     | China  | 2017 | MF807952.1 |
| CH/JXJA/2017                  | China  | 2017 | MF375374.1 |
| PEDV-SX                       | China  | 2017 | KY420075.1 |
| PEDV/MEX/QRO/02/2017          | Mexico | 2017 | MH013466.1 |
| PC273/O                       | USA    | 2017 | MG837058.1 |
| USA/OK10240-8/2017            | USA    | 2017 | MG334555.1 |

---
